# Supplementary material for: Synthesis and Characterisation of Acrylic Resin-Al Powder Composites Suitable for Additive Manufacturing
Source: MDPI journal article supplement (doi:10.3390/polym12081642), 2020-07-23
Supplement: s1 [file s1]

## Supplementary Materials

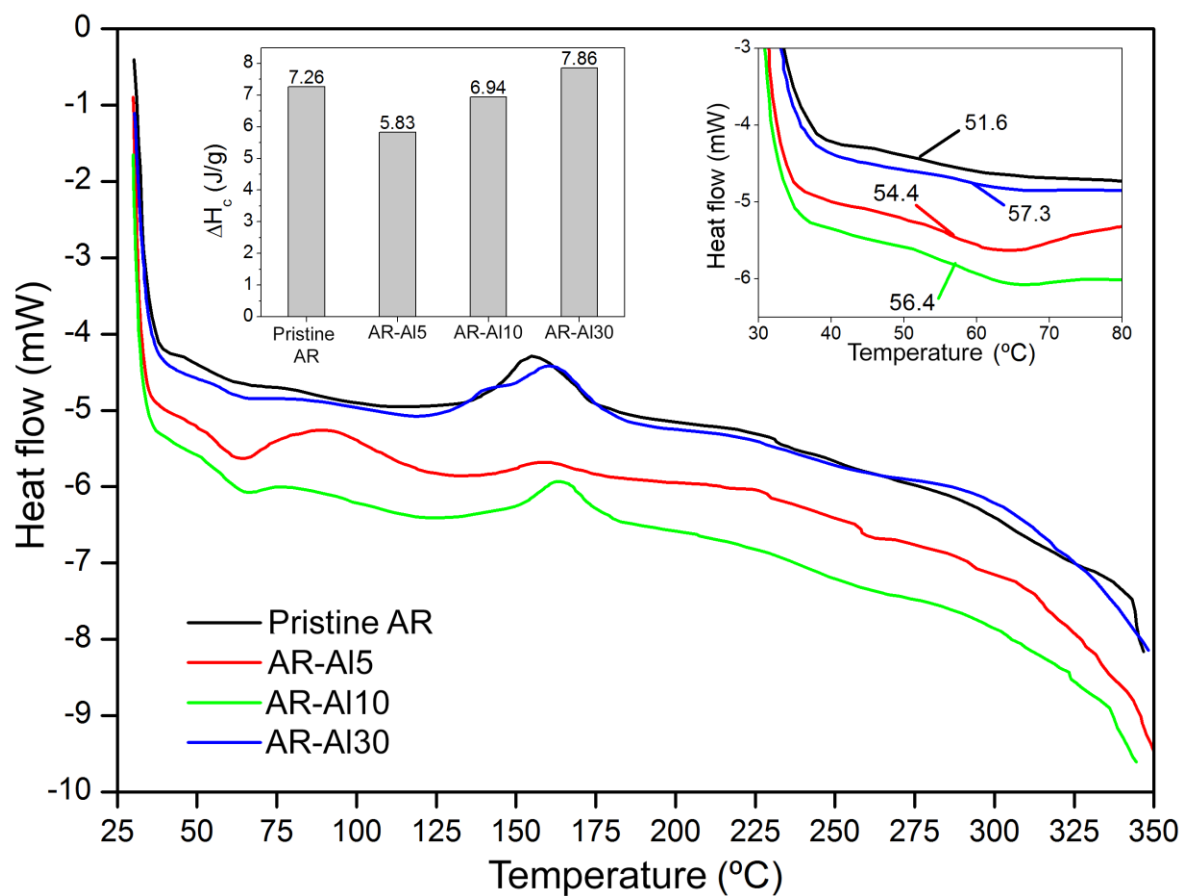

Figure S1: DSC curves of AR-Al composites. The upper right inset shows a zoom of the range of temperature where glass transition temperatures are located. The upper left inset shows the enthalpy values corresponding to curing peaks.
